# Supplementary material
Source: PubMed Central journal article supplement (PMC6521686)
Supplement: jamadermatol-155-298-s001.pdf [file jamadermatol-155-298-s001.pdf]

## Supplementary Online Content

Venables ZC, Autier P, Nijsten T, et al. Nationwide incidence of metastatic cutaneous squamous cell carcinoma in England. *JAMA Dermatol*. Published online November 28, 2018. doi:10.1001/jamadermatol.2018.4219

**eTable 1.** Flowchart of Patient Cohorts From the National Cancer Registration and Analysis Service, England 2013-2015

This supplementary material has been provided by the authors to give readers additional information about their work.

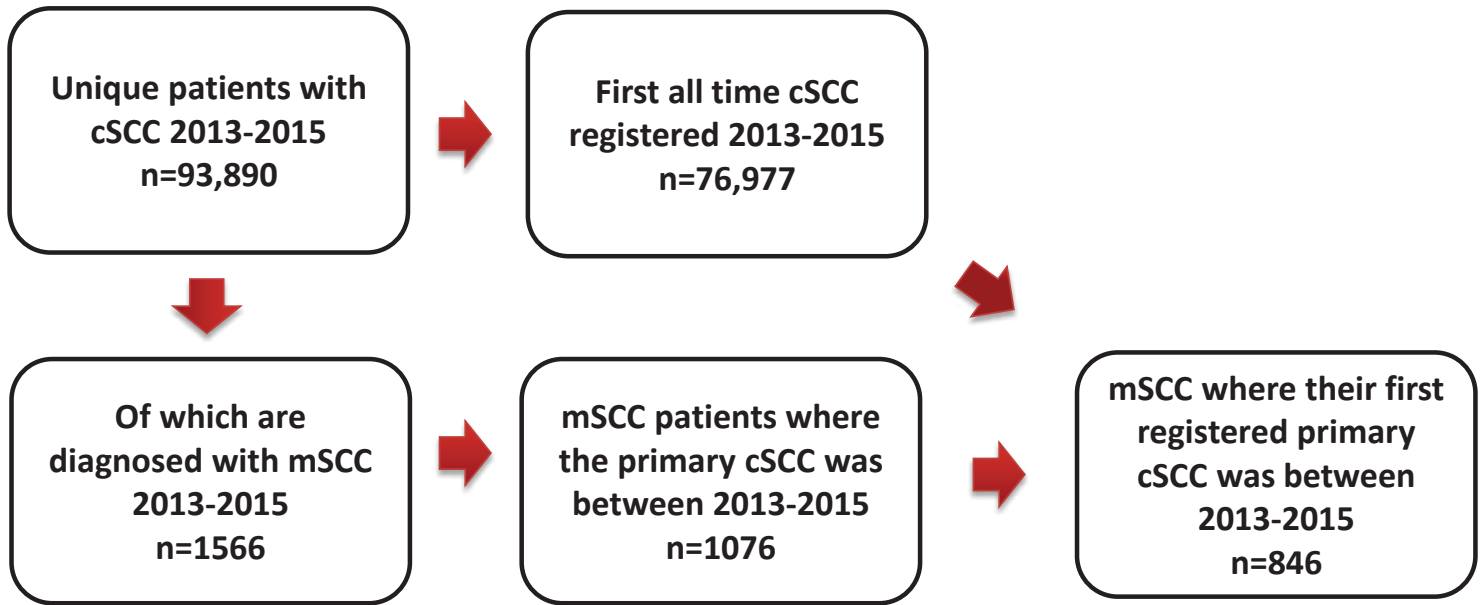

**Figure 1.** Flowchart of patient cohorts from the National Cancer Registration and Analysis Service, England 2013-2015. cSCC = cutaneous squamous cell carcinoma mSCC = metastatic cutaneous SCC
